# Supplementary material for: STM investigation of structural isomers: alkyl chain position induced self-assembly at the liquid/solid interface
Source: Royal Society of Chemistry journal article supplement (doi:10.1039/c5cp05795g), 2015-11-19
Supplement: c5cp05795g1.pdf [file c5cp05795g1.pdf]

## Supporting Information

### **STM investigation of structural isomers: alkyl chain position induced self-assembly at liquid/solid interface**

Yi Hu, Kai Miao, Bao Zha, Li Xu\*, Xinrui Miao, Wenli Deng\*

College of Materials Science and Engineering, South China University of Technology, Guangzhou  
510640, China

**E-mail Address:** mslxu@scut.edu.cn, wldeng@scut.edu.cn

**Corresponding author:** College of Materials Science and Engineering

South China University of Technology,

Wushan Road, Tianhe District, Guangzhou 510640, P. R. China.

Tel: (+86)020-22236708

E-mail: mslxu@scut.edu.cn; wldeng@scut.edu.cn

## Synthesize

1,8-A, 2,6-A, 1,5-A, 1,4-A ( $n = 15, 16$ ) were synthesized from the commercially available 1,8-dihydroxyanthraquinone, 2,6-dihydroxyanthraquinone, 1,4-dihydroxyanthraquinone and 1,5-dihydroxyanthraquinone, in DMF (dry, 150 °C, 50mL) along with  $\text{Cs}_2\text{CO}_3$  added (Scheme S1). The reaction finished thirty hours later and proved to be quite successful with a yield of 97%. The desired products were obtained by repeated recrystallization in view of high degree purity. All of the chemical reagents were purchased from Tokyo Chemical Industry without further purification. The products were dissolved in  $\text{CH}_2\text{Cl}_2$  for observing their color (Figure S1).

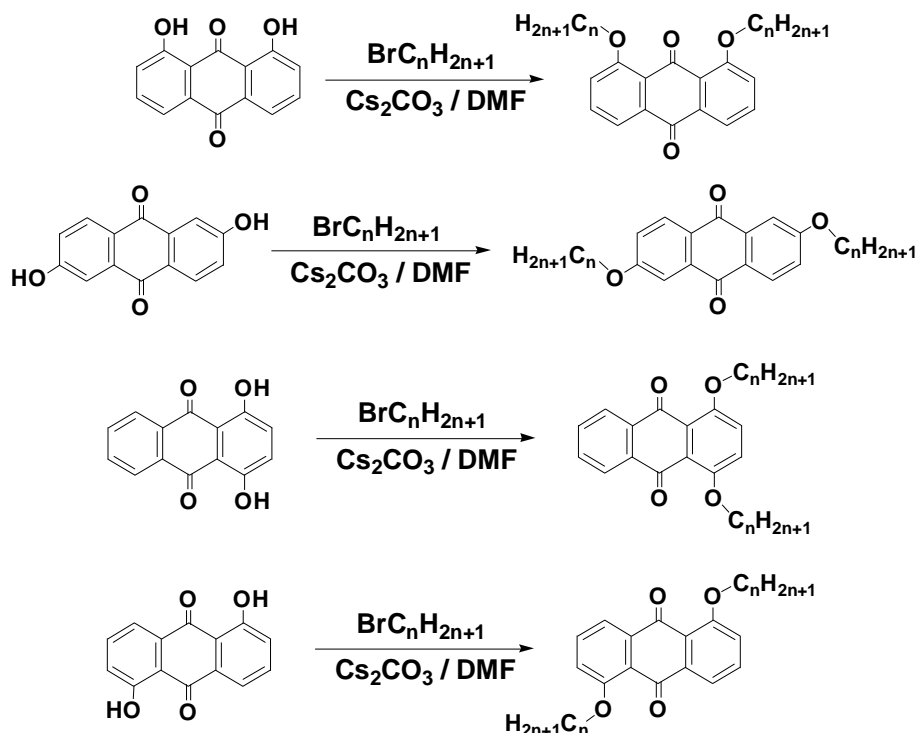

**Scheme S1.** Synthesis of 1,8-A, 2,6-A, 1,5-A, 1,4-A ( $n = 15, 16$ ) derivatives.

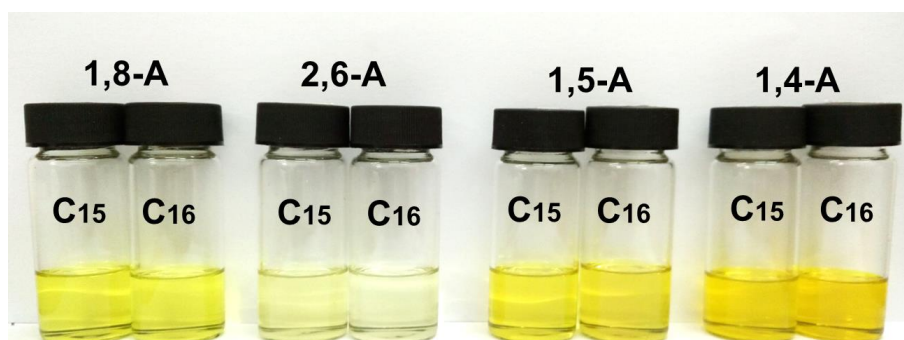

**Fig. S1** Photography of the structural isomers of anthraquinone derivatives in  $\text{CH}_2\text{Cl}_2$  ( $10^{-2}$  M).

## Characterization data:

- 1,8-A-2OC<sub>16</sub>: <sup>1</sup>H NMR (400 MHz CDCl<sub>3</sub>) δ 7.82 (d, 2H), 7.60 (t, 2H), 7.28 (d, 2H), 4.15 (t, 4H), 1.93 (m, 4H), 1.57 (m, 4H), 1.28 (m, 48H), 0.90 (t, 6H)  
MS: 689 [C<sub>46</sub>H<sub>73</sub>O<sub>4</sub>]<sup>+</sup>.
- 1,8-A-2OC<sub>15</sub>: <sup>1</sup>H NMR (400 MHz CDCl<sub>3</sub>) δ 7.82 (d, 2H), 7.60 (t, 2H), 7.28 (d, 2H), 4.15 (t, 4H), 1.93 (m, 4H), 1.59 (m, 8H), 1.28 (m, 40H), 0.90 (t, 6H)  
MS: 661 [C<sub>44</sub>H<sub>69</sub>O<sub>4</sub>]<sup>+</sup>.
- 2,6-A-2OC<sub>16</sub>: <sup>1</sup>H NMR (400 MHz CDCl<sub>3</sub>) δ 8.24 (d, 2H), 7.73 (s, 2H), 7.25 (d, 2H), 4.17 (t, 4H), 1.87 (m, 4H), 1.51 (m, 4H), 1.28 (m, 48H), 0.90 (t, 6H)  
MS: [C<sub>46</sub>H<sub>73</sub>O<sub>4</sub>]<sup>+</sup>.
- 2,6-A-2OC<sub>15</sub>: <sup>1</sup>H NMR (400 MHz CDCl<sub>3</sub>) δ 8.25 (d, 2H), 7.73 (s, 2H), 7.24 (d, 2H), 4.17 (t, 4H), 1.87 (m, 4H), 1.51 (m, 4H), 1.28 (m, 44H), 0.90 (t, 6H)  
MS: [C<sub>44</sub>H<sub>69</sub>O<sub>4</sub>]<sup>+</sup>.
- 1,4-A-2OC<sub>16</sub>: <sup>1</sup>H NMR (400 MHz CDCl<sub>3</sub>) δ 8.18 (m, 2H), 7.71 (m, 2H), 7.32 (s, 2H), 4.11 (t, 4H), 1.94 (m, 4H), 1.27 (m, 52H), 0.89 (t, 6H)  
MS: 689 [C<sub>46</sub>H<sub>73</sub>O<sub>4</sub>]<sup>+</sup>.
- 1,4-A-2OC<sub>15</sub>: <sup>1</sup>H NMR (400 MHz CDCl<sub>3</sub>) δ 8.18 (m, 2H), 7.71 (m, 2H), 7.32 (s, 2H), 4.11 (t, 4H), 1.94 (m, 4H), 1.27 (m, 48H), 0.89 (t, 6H)  
MS: 683 [C<sub>44</sub>H<sub>68</sub>NaO<sub>4</sub>]<sup>+</sup>.
- 1,5-A-2OC<sub>16</sub>: <sup>1</sup>H NMR (400 MHz CDCl<sub>3</sub>) δ 7.90 (d, 2H), 7.67 (t, 2H), 7.27 (d, 2H), 4.17 (t, 4H), 1.97 (m, 4H), 1.59 (m, 8H), 1.28 (m, 44H), 0.90 (t, 6H)  
MS: 689 [C<sub>46</sub>H<sub>73</sub>O<sub>4</sub>]<sup>+</sup>.
- 1,5-A-2OC<sub>15</sub>: <sup>1</sup>H NMR (400 MHz CDCl<sub>3</sub>) δ 7.89 (d, 2H), 7.67 (t, 2H), 7.25 (d, 2H), 4.17 (t, 4H), 1.97 (m, 4H), 1.57 (m, 8H), 1.26 (m, 40H), 0.90 (t, 6H)  
MS: 661 [C<sub>44</sub>H<sub>69</sub>O<sub>4</sub>]<sup>+</sup>.

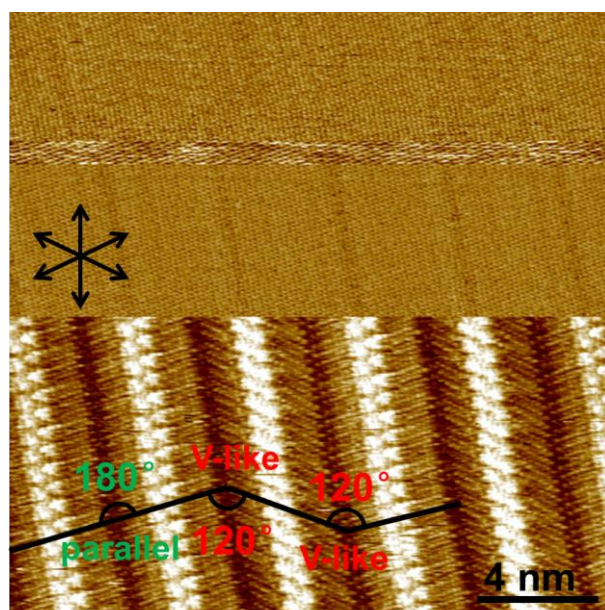

**Fig. S2** STM image consists both of the 1,8-A-2OC<sub>15</sub> and the HOPG surface, indicating that alkyl chains extend along the orientation of the graphite lattice, no matter they are tail-to-tail in a parallel or V-like way. Concentration:  $4.84 \times 10^{-3}$  M. Imaging conditions:  $I_t = 580$  pA,  $V_{\text{bias}} = 100 \sim 790$  mV.

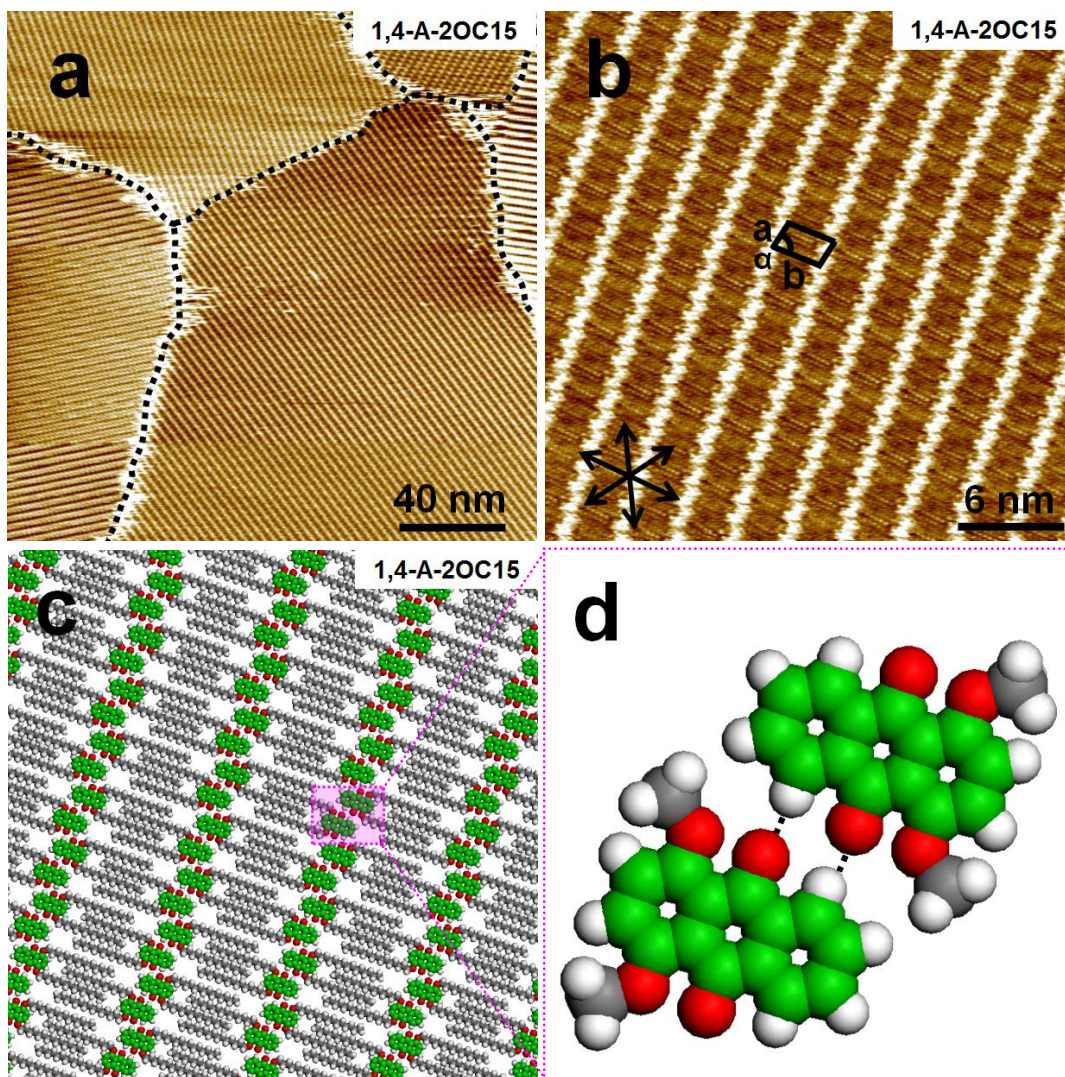

**Fig. S3** (a) Large-scale and (b) high-resolution STM images of 1,4-A-2OC<sub>15</sub> self-assembled monolayer on HOPG surface. Concentration:  $5.34 \times 10^{-3}$  M. A unit cell consists two molecules is overlaid in (b), with the measured parameters of  $a = 1.5 \pm 0.1$  nm,  $b = 3.5 \pm 0.1$  nm and  $\alpha = 74 \pm 1^\circ$ . The calculated area density is  $2.52 \text{ nm}^2$  per molecule. A set of black arrows in (b) show the basic symmetry axis of the graphite substrate. (c) Molecular model of the dimer zigzag structure (Z-like II). (d) Illustration of C=O  $\cdots$  H-C hydrogen bonding interactions within the dimer aggregations. The long alkyl chains are replaced by methyl groups. Imaging conditions:  $I_t = 560$  pA,  $V_{\text{bias}} = 630$  mV.

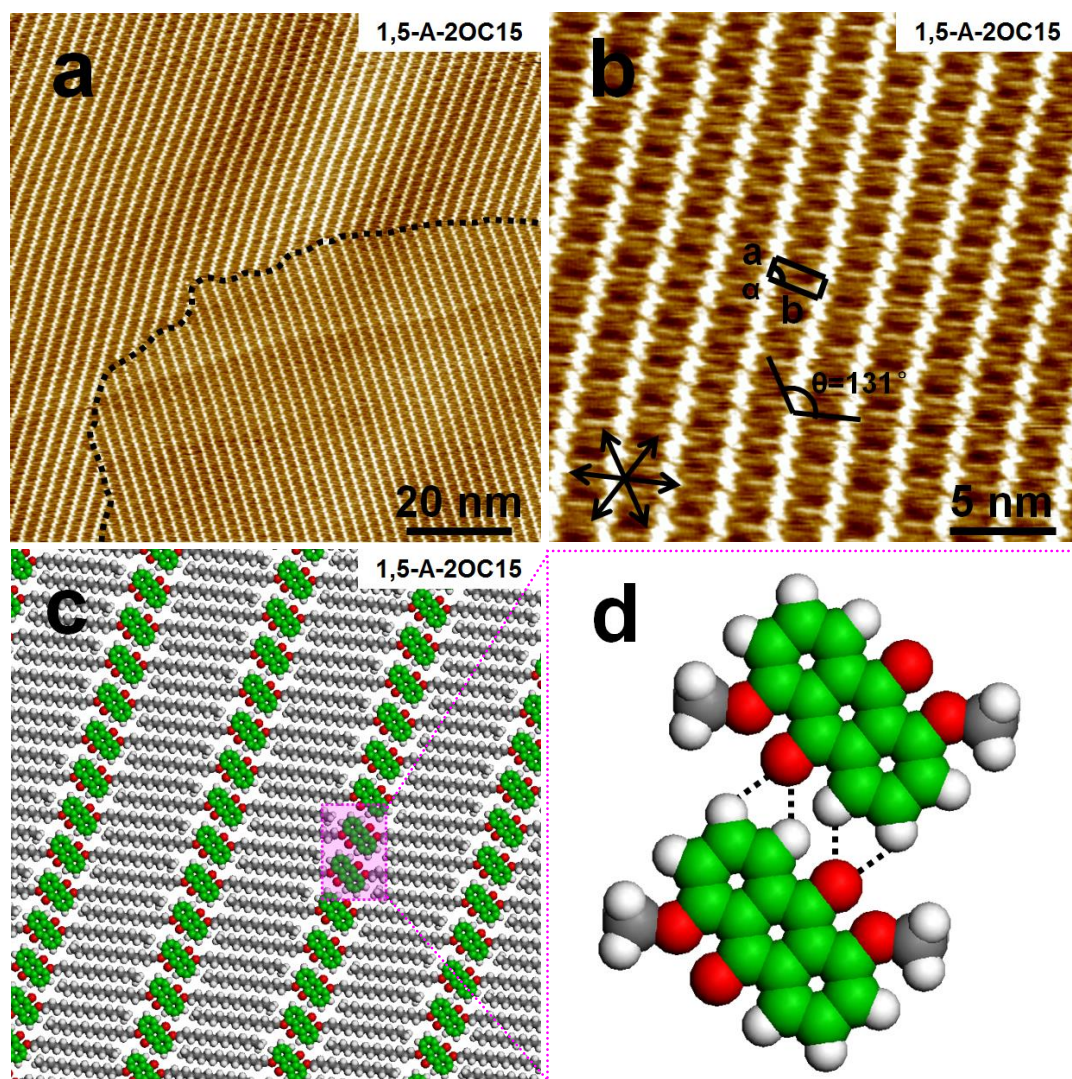

**Fig. S4** (a) Large-scale and (b) high-resolution STM images of 1,5-A-2OC<sub>15</sub> self-assembled monolayer on HOPG surface. Concentration:  $1.96 \times 10^{-3}$  M. A unit cell consists one molecules is overlaid in (b), with the measured parameters of  $a = 1.1 \pm 0.1$  nm,  $b = 2.7 \pm 0.1$  nm and  $\alpha = 88 \pm 2^\circ$ . Area density is calculated to be  $2.97 \text{ nm}^2$  per molecule. A set of black arrows in (b) show the basic symmetry axis of the graphite substrate. (c) Molecular model of the linear structure (Linear IV). (d) Illustration of C=O  $\cdots$  H-C hydrogen bonding interactions within the dimer aggregations. The long alkyl chains are replaced by methyl groups. Imaging conditions:  $I_t = 590$  pA,  $V_{\text{bias}} = 760$  mV.

**Table S1.** The maximum absorbance peaks of anthraquinone isomers.

| molecules                   | 1,8-A           |                 | 2,6-A           |                 | 1,4-A           |                 | 1,5-A           |                 |
|-----------------------------|-----------------|-----------------|-----------------|-----------------|-----------------|-----------------|-----------------|-----------------|
|                             | C <sub>16</sub> | C <sub>15</sub> |
| $\lambda_{\text{max}}$ (nm) | 385             |                 | 350             |                 | 380             |                 | 420             |                 |

**Table S2.** Phase transition temperature of anthraquinone isomers

|            | 2,6-A           |     | 1,8-A |     | 1,5-A |     | 1,4-A |    |
|------------|-----------------|-----|-------|-----|-------|-----|-------|----|
| melting    | C <sub>16</sub> | 117 | >     | 112 | >     | 102 | >     | 91 |
| point (°C) | C <sub>15</sub> | 111 | >     | 109 | >     | 104 | >     | 97 |
